# Supplementary material for: Effects of the alkyl group in (dialkylamino)perfluorophenazines on the melting point and fluorescence properties
Source: Royal Society of Chemistry journal article supplement (doi:10.1039/c4ra09342a), 2014-11-07
Supplement: c4ra09342a1.pdf [file c4ra09342a1.pdf]

## Electronic supplementary information

### Effects of alkyl group in (dialkylamino)perfluorophenazines on melting point and solid-state fluorescence

Siddanagouda Biradar,<sup>a</sup> Yasuhiro Shigemitsu,<sup>b</sup> Yasuhiro Kubota,<sup>a</sup> Kazumasa Funabiki,<sup>a</sup>

Hiroyasu Sato<sup>c</sup> and Masaki Matsui\*<sup>a</sup>

<sup>a</sup>*Department of Chemistry and Biomolecular Science,*

*Faculty of Engineering, Gifu University, Yanagido, Gifu 501-1193, Japan*

<sup>b</sup>*Industrial Technology Center of Nagasaki, 2-1303-8 Ikeda, Omura, Nagasaki  
856-0026, Japan*

<sup>d</sup>*Applied Technology Center, Rigaku Corporation, 3-9-12 Matsubara-Cho, Akishima,  
Tokyo 196-8666, Japan*

Figure S1. <sup>1</sup>H NMR spectrum of **3a**.

Figure S2. <sup>19</sup>F NMR spectrum of **3a**.

Figure S3. <sup>1</sup>H NMR spectrum of **3b**.

Figure S4. <sup>19</sup>F NMR spectrum of **3b**.

Figure S5. <sup>1</sup>H NMR spectrum of **3c**.

Figure S6. <sup>19</sup>F NMR spectrum of **3c**.

Figure S7. <sup>1</sup>H NMR spectrum of **3d**.

Figure S8. <sup>19</sup>F NMR spectrum of **3d**.

Figure S9. <sup>1</sup>H NMR spectrum of **3e**.

Figure S10. <sup>19</sup>F NMR spectrum of **3e**.

Figure S11. HPLC chart of **3e**.

Figure S12. <sup>1</sup>H NMR spectrum of **3f**.

Figure S13. <sup>19</sup>F NMR spectrum of **3f**.

Figure S14. HPLC chart of **3f**.

Figure S15. <sup>1</sup>H NMR spectrum of **3g**.

Figure S16. <sup>19</sup>F NMR spectrum of **3g**.

Figure S17. <sup>1</sup>H NMR spectrum of **4b**.

Figure S18. <sup>19</sup>F NMR spectrum of **4b**.

Figure S19. <sup>1</sup>H NMR spectrum of **4c**.

Figure S20. <sup>19</sup>F NMR spectrum of **4c**.

- Figure S21.  $^1\text{H}$  NMR spectrum of **4e**.  
Figure S22.  $^{19}\text{F}$  NMR spectrum of **4e**.  
Figure S23. HPLC chart of **4e**.  
Figure S24.  $^1\text{H}$  NMR spectrum of **4f**.  
Figure S25.  $^{19}\text{F}$  NMR spectrum of **4f**.  
Figure S26.  $^1\text{H}$  NMR spectrum of **4g**.  
Figure S27.  $^{19}\text{F}$  NMR spectrum of **4g**.  
Figure S28.  $^1\text{H}$  NMR spectrum of **3'g**.

X-ray data for **3a**

X-ray data for **3g**



**Figure S1.**  $^1\text{H}$ -NMR spectrum of 2-(dimethylamino)perfluorophenazine (**3a**).



**Figure S2.**  $^{19}\text{F}$ -NMR spectrum of 2-(dimethylamino)perfluorophenazine (**3a**).



Figure S3.  $^1\text{H-NMR}$  spectrum of 2-(diethylamino)perfluorophenazine (**3b**).



Figure S4.  $^{19}\text{F-NMR}$  spectrum of 2-(diethylamino)perfluorophenazine (**3b**).





Figure S7.  $^1\text{H}$ -NMR spectrum of 2-(dihexylamino)perfluorophenazine (**3d**).



Figure S8.  $^{19}\text{F}$ -NMR spectrum of 2-(dihexylamino)perfluorophenazine (**3d**).



Figure S9.  $^1\text{H}$ -NMR spectrum of 2-(dioctylamino)perfluorophenazine (**3e**).



Figure S10.  $^{19}\text{F}$ -NMR spectrum of 2-(dioctylamino)perfluorophenazine (**3e**).



**Figure S11.** HPLC chart of **3e**. Column: Mightysil Si60 (Kanto Chemical Co., Lnc.), 250 mm x 4.6 mm, Eluent: chloroform : hexane = 2 : 8, Flow: 0.5 mL min<sup>-1</sup>, Detection: 254 nm.



**Figure S12.** <sup>1</sup>H-NMR spectrum of 2-(didodecylamino)perfluorophenazine (**3f**).



**Figure S13.**  $^{19}\text{F}$ -NMR spectrum of 2-(didodecylamino)perfluorophenazine (**3f**).



**Figure S14.** HPLC chart of 2-(didodecylamino)perfluorophenazine (**3f**). Column: Mightysil Si60 (Kanto Chemical Co., Lnc.), 250 mm x 4.6 mm, Eluent: chloroform : hexane = 2 : 8, Flow:  $0.5\text{ mL min}^{-1}$ , Detection: 254 nm.



**Figure S15.**  $^1\text{H}$ -NMR spectrum of 2-(dioctadecylamino)perfluorophenazine (**3g**).



**Figure S16.**  $^{19}\text{F}$ -NMR spectrum of 2-(dioctadecylamino)perfluorophenazine (**3g**).



Figure S17.  $^1\text{H-NMR}$  spectrum of 2,7-bis(diethylamino)perfluorophenazine (**4b**).



Figure S18.  $^{19}\text{F-NMR}$  spectrum of 2,7-bis(diethylamino)perfluorophenazine (**4b**).





Figure S21. <sup>1</sup>H-NMR spectrum of 2,7-bis(diocetylamo)perfluorophenazine (**4e**).



Figure S22. <sup>19</sup>F-NMR spectrum of 2,7-bis(diocetylamo)perfluorophenazine (**4e**).



**Figure S23.** HPLC chart of 2,7-bis(dioctylamino)perfluorophenazine (**4e**). Column: Mightysil Si60 (Kanto Chemical Co., Lnc.), 250 mm x 4.6 mm, Eluent: chloroform : hexane = 2 : 8, Flow: 0.5 mL min<sup>-1</sup>, Detection: 254 nm.



**Figure S24.** <sup>1</sup>H-NMR spectrum of 2,7-bis(didodecylamino)perfluorophenazine (**4f**).







**Figure S29.** <sup>13</sup>C-NMR spectrum of 2-(otadecylamino)phenazine (**3'g**).

**Table S1.** UV-vis absorption and fluorescence spectra of **3a** in various solvents

| Solvent       | $\Delta f$ | $\lambda_{\max} / \text{nm}$ | $F_{\max} / \text{nm}$ |
|---------------|------------|------------------------------|------------------------|
| Hexane        | 0          | 466                          | 548                    |
| Cyclohexane   | 0          | 470                          | 551                    |
| Toluene       | 0.02       | 479                          | 597                    |
| Ethyl acetate | 0.19       | 480                          | 643                    |
| THF           | 0.21       | 481                          | 647                    |
| Acetone       | 0.28       | 481                          | 664                    |

X-ray data for **3a**



**Figur S29.** Compound **3a**.

**Table S2.** Crystal Data for **3a**

---

|                                       |                                                                                                                                                               |
|---------------------------------------|---------------------------------------------------------------------------------------------------------------------------------------------------------------|
| Empirical Formula                     | C <sub>14</sub> H <sub>6</sub> F <sub>7</sub> N <sub>3</sub>                                                                                                  |
| Formula Weight                        | 349.21                                                                                                                                                        |
| Crystal Color, Habit                  | red, needle                                                                                                                                                   |
| Crystal Dimensions                    | 0.340 X 0.080 X 0.010 mm                                                                                                                                      |
| Crystal System                        | monoclinic                                                                                                                                                    |
| Lattice Parameters                    | $a = 21.7935(6) \text{ \AA}$<br>$b = 4.37356(11) \text{ \AA}$<br>$c = 26.8772(7) \text{ \AA}$<br>$\beta = 94.408(7)^\circ$<br>$V = 2554.23(11) \text{ \AA}^3$ |
| Space Group                           | P2 <sub>1</sub> /c (#14)                                                                                                                                      |
| Z value                               | 8                                                                                                                                                             |
| D <sub>calc</sub>                     | 1.816 g cm <sup>-3</sup>                                                                                                                                      |
| F <sub>000</sub>                      | 1392.00                                                                                                                                                       |
| $\mu(\text{CuK}\alpha)$               | 16.510 cm <sup>-1</sup>                                                                                                                                       |
| Temperature                           | -180.0°C                                                                                                                                                      |
| No. of Reflections Measured           | Total: 26719                                                                                                                                                  |
|                                       | Absorption<br>(trans. factors: 0.650 - 0.984)<br>Unique: 4664 ( $R_{\text{int}} = 0.0450$ )                                                                   |
| No. Observations (All reflections)    | 4664                                                                                                                                                          |
| No. Variables                         | 437                                                                                                                                                           |
| Reflection/Parameter Ratio            | 10.67                                                                                                                                                         |
| Residuals: R1 ( $I > 2.00\sigma(I)$ ) | 0.0542                                                                                                                                                        |
| Residuals: R (All reflections)        | 0.0625                                                                                                                                                        |
| Residuals: wR2 (All reflections)      | 0.1728                                                                                                                                                        |
| Goodness of Fit Indicator             | 1.100                                                                                                                                                         |

---

**Table S3.** Atomic coordinates and  $B_{iso}/B_{eq}$  for **3a**

| atom | x           | y          | z            | $B_{eq}$ |
|------|-------------|------------|--------------|----------|
| F1   | 0.56043(10) | 1.2755(6)  | 0.00075(8)   | 2.98(5)  |
| F2   | 0.71329(10) | 0.5318(6)  | 0.04539(8)   | 2.92(4)  |
| F3   | 0.74218(10) | 0.4933(5)  | -0.04863(8)  | 2.94(4)  |
| F4   | 0.69806(10) | 0.7631(5)  | -0.22159(8)  | 2.73(4)  |
| F5   | 0.63156(11) | 1.1005(6)  | -0.29154(8)  | 3.19(5)  |
| F6   | 0.54715(10) | 1.5012(6)  | -0.26524(8)  | 2.93(4)  |
| F7   | 0.52118(10) | 1.5604(5)  | -0.16865(8)  | 2.82(4)  |
| F8   | 0.94549(9)  | 0.9528(5)  | 0.23970(8)   | 2.47(4)  |
| F9   | 0.79419(10) | 0.3098(5)  | 0.30389(7)   | 2.50(4)  |
| F10  | 0.76171(9)  | 0.1026(5)  | 0.21369(8)   | 2.50(4)  |
| F11  | 0.79954(9)  | 0.0290(5)  | 0.04032(8)   | 2.44(4)  |
| F12  | 0.86230(10) | 0.2211(5)  | -0.03712(7)  | 2.59(4)  |
| F13  | 0.94842(10) | 0.6587(5)  | -0.02425(7)  | 2.55(4)  |
| F14  | 0.97968(9)  | 0.8967(5)  | 0.06720(8)   | 2.44(4)  |
| N1   | 0.58383(13) | 1.2235(8)  | -0.09525(11) | 2.25(6)  |
| N2   | 0.67880(13) | 0.8236(8)  | -0.12245(11) | 2.21(5)  |
| N3   | 0.62425(15) | 0.9111(9)  | 0.07670(12)  | 2.99(7)  |
| N4   | 0.91945(13) | 0.7174(7)  | 0.14816(11)  | 1.88(5)  |
| N5   | 0.82281(13) | 0.2765(7)  | 0.13332(11)  | 1.88(5)  |
| N6   | 0.88730(14) | 0.7363(8)  | 0.32360(11)  | 2.60(6)  |
| C1   | 0.60424(16) | 1.0726(10) | -0.01037(14) | 2.36(7)  |
| C2   | 0.63595(16) | 0.9123(10) | 0.02714(14)  | 2.44(7)  |
| C3   | 0.68368(17) | 0.7132(9)  | 0.01106(14)  | 2.40(7)  |
| C4   | 0.69771(16) | 0.6891(9)  | -0.03684(14) | 2.24(6)  |
| C5   | 0.66488(16) | 0.8545(9)  | -0.07560(14) | 2.16(6)  |
| C6   | 0.61611(16) | 1.0515(9)  | -0.06145(14) | 2.16(6)  |
| C7   | 0.65578(16) | 0.9610(9)  | -0.20828(14) | 2.30(7)  |
| C8   | 0.62290(17) | 1.1263(10) | -0.24297(13) | 2.43(7)  |
| C9   | 0.57723(17) | 1.3330(10) | -0.22913(14) | 2.43(7)  |
| C10  | 0.56503(16) | 1.3642(9)  | -0.18088(14) | 2.31(6)  |
| C11  | 0.59805(16) | 1.1934(9)  | -0.14292(13) | 2.11(6)  |

|     |             |            |              |          |
|-----|-------------|------------|--------------|----------|
| C12 | 0.64527(16) | 0.9913(9)  | -0.15660(13) | 2.17(6)  |
| C13 | 0.67439(18) | 0.9577(11) | 0.11555(14)  | 2.95(8)  |
| C14 | 0.56428(19) | 0.9978(14) | 0.09191(16)  | 4.03(11) |
| C15 | 0.90170(16) | 0.7319(9)  | 0.23457(13)  | 2.06(6)  |
| C16 | 0.87193(16) | 0.6412(9)  | 0.27623(13)  | 2.01(6)  |
| C17 | 0.82315(16) | 0.4221(9)  | 0.26550(13)  | 2.01(6)  |
| C18 | 0.80674(15) | 0.3108(9)  | 0.21974(13)  | 1.99(6)  |
| C19 | 0.83853(15) | 0.3991(8)  | 0.17745(13)  | 1.87(6)  |
| C20 | 0.88803(15) | 0.6184(8)  | 0.18618(13)  | 1.88(6)  |
| C21 | 0.84238(16) | 0.2483(9)  | 0.04706(14)  | 2.04(6)  |
| C22 | 0.87308(16) | 0.3428(9)  | 0.00850(13)  | 2.02(6)  |
| C23 | 0.91992(16) | 0.5683(9)  | 0.01578(13)  | 2.10(6)  |
| C24 | 0.93475(16) | 0.6879(9)  | 0.06125(13)  | 2.06(6)  |
| C25 | 0.90334(15) | 0.5939(8)  | 0.10336(13)  | 1.86(6)  |
| C26 | 0.85539(15) | 0.3718(9)  | 0.09560(13)  | 1.86(6)  |
| C27 | 0.84285(18) | 0.7706(10) | 0.36163(14)  | 2.69(7)  |
| C28 | 0.94975(17) | 0.8448(11) | 0.33908(14)  | 2.77(7)  |

---


$$B_{\text{eq}} = 8/3 \pi^2 (U_{11}(\text{aa}^*)^2 + U_{22}(\text{bb}^*)^2 + U_{33}(\text{cc}^*)^2 + 2U_{12}(\text{aa}^*\text{bb}^*)\cos \gamma + 2U_{13}(\text{aa}^*\text{cc}^*)\cos \beta + 2U_{23}(\text{bb}^*\text{cc}^*)\cos \alpha)$$

**Table S4.** Bond lengths (Å) for **3a**

| atom | atom | distance | atom | atom | distance |
|------|------|----------|------|------|----------|
| F1   | C1   | 1.354(5) | F2   | C3   | 1.344(4) |
| F3   | C4   | 1.349(4) | F4   | C7   | 1.333(4) |
| F5   | C8   | 1.338(4) | F6   | C9   | 1.347(4) |
| F7   | C10  | 1.344(4) | F8   | C15  | 1.358(4) |
| F9   | C17  | 1.343(4) | F10  | C18  | 1.340(4) |
| F11  | C21  | 1.341(4) | F12  | C22  | 1.341(4) |
| F13  | C23  | 1.343(4) | F14  | C24  | 1.339(4) |
| N1   | C6   | 1.337(5) | N1   | C11  | 1.348(5) |
| N2   | C5   | 1.325(5) | N2   | C12  | 1.346(5) |
| N3   | C2   | 1.375(5) | N3   | C13  | 1.467(5) |
| N3   | C14  | 1.450(6) | N4   | C20  | 1.345(5) |
| N4   | C25  | 1.342(5) | N5   | C19  | 1.323(5) |
| N5   | C26  | 1.348(5) | N6   | C16  | 1.357(5) |
| N6   | C27  | 1.469(5) | N6   | C28  | 1.471(5) |
| C1   | C2   | 1.371(5) | C1   | C6   | 1.419(5) |
| C2   | C3   | 1.448(6) | C3   | C4   | 1.350(5) |
| C4   | C5   | 1.416(5) | C5   | C6   | 1.442(5) |
| C7   | C8   | 1.343(5) | C7   | C12  | 1.431(5) |
| C8   | C9   | 1.415(6) | C9   | C10  | 1.351(5) |
| C10  | C11  | 1.416(5) | C11  | C12  | 1.426(5) |
| C15  | C16  | 1.394(5) | C15  | C20  | 1.403(5) |
| C16  | C17  | 1.443(5) | C17  | C18  | 1.345(5) |
| C18  | C19  | 1.429(5) | C19  | C20  | 1.449(5) |
| C21  | C22  | 1.341(5) | C21  | C26  | 1.420(5) |
| C22  | C23  | 1.422(5) | C23  | C24  | 1.346(5) |
| C24  | C25  | 1.427(5) | C25  | C26  | 1.430(5) |

**Table S5.** Bond angles (°) for **3a**

| atom | atom | atom | angle    | atom | atom | atom | angle    |
|------|------|------|----------|------|------|------|----------|
| C6   | N1   | C11  | 116.3(3) | C5   | N2   | C12  | 116.1(3) |
| C2   | N3   | C13  | 120.4(3) | C2   | N3   | C14  | 120.7(3) |
| C13  | N3   | C14  | 113.7(3) | C20  | N4   | C25  | 116.0(3) |
| C19  | N5   | C26  | 115.7(3) | C16  | N6   | C27  | 123.8(3) |
| C16  | N6   | C28  | 121.4(3) | C27  | N6   | C28  | 114.6(3) |
| F1   | C1   | C2   | 119.8(3) | F1   | C1   | C6   | 116.1(3) |
| C2   | C1   | C6   | 124.0(4) | N3   | C2   | C1   | 126.4(4) |
| N3   | C2   | C3   | 118.5(3) | C1   | C2   | C3   | 114.9(3) |
| F2   | C3   | C2   | 117.9(3) | F2   | C3   | C4   | 118.5(3) |
| C2   | C3   | C4   | 123.5(3) | F3   | C4   | C3   | 119.5(3) |
| F3   | C4   | C5   | 118.9(3) | C3   | C4   | C5   | 121.5(3) |
| N2   | C5   | C4   | 120.5(3) | N2   | C5   | C6   | 122.6(3) |
| C4   | C5   | C6   | 116.9(3) | N1   | C6   | C1   | 119.7(3) |
| N1   | C6   | C5   | 121.1(3) | C1   | C6   | C5   | 119.1(3) |
| F4   | C7   | C8   | 120.4(3) | F4   | C7   | C12  | 119.1(3) |
| C8   | C7   | C12  | 120.5(4) | F5   | C8   | C7   | 121.6(4) |
| F5   | C8   | C9   | 117.7(3) | C7   | C8   | C9   | 120.7(3) |
| F6   | C9   | C8   | 118.2(3) | F6   | C9   | C10  | 121.0(3) |
| C8   | C9   | C10  | 120.8(3) | F7   | C10  | C9   | 119.7(3) |
| F7   | C10  | C11  | 119.5(3) | C9   | C10  | C11  | 120.8(4) |
| N1   | C11  | C10  | 119.5(3) | N1   | C11  | C12  | 121.9(3) |
| C10  | C11  | C12  | 118.6(3) | N2   | C12  | C7   | 119.5(3) |
| N2   | C12  | C11  | 121.8(3) | C7   | C12  | C11  | 118.7(3) |
| F8   | C15  | C16  | 119.2(3) | F8   | C15  | C20  | 116.3(3) |
| C16  | C15  | C20  | 124.4(3) | N6   | C16  | C15  | 124.7(3) |
| N6   | C16  | C17  | 121.1(3) | C15  | C16  | C17  | 114.2(3) |
| F9   | C17  | C16  | 118.1(3) | F9   | C17  | C18  | 117.5(3) |
| C16  | C17  | C18  | 124.2(3) | F10  | C18  | C17  | 119.9(3) |
| F10  | C18  | C19  | 118.9(3) | C17  | C18  | C19  | 121.2(3) |
| N5   | C19  | C18  | 119.7(3) | N5   | C19  | C20  | 123.5(3) |
| C18  | C19  | C20  | 116.8(3) | N4   | C20  | C15  | 120.4(3) |
| N4   | C20  | C19  | 120.4(3) | C15  | C20  | C19  | 119.1(3) |

|     |     |     |          |     |     |     |          |
|-----|-----|-----|----------|-----|-----|-----|----------|
| F11 | C21 | C22 | 120.0(3) | F11 | C21 | C26 | 118.9(3) |
| C22 | C21 | C26 | 121.1(3) | F12 | C22 | C21 | 121.4(3) |
| F12 | C22 | C23 | 118.3(3) | C21 | C22 | C23 | 120.2(3) |
| F13 | C23 | C22 | 117.7(3) | F13 | C23 | C24 | 121.3(3) |
| C22 | C23 | C24 | 121.0(3) | F14 | C24 | C23 | 119.7(3) |
| F14 | C24 | C25 | 119.5(3) | C23 | C24 | C25 | 120.8(3) |
| N4  | C25 | C24 | 119.2(3) | N4  | C25 | C26 | 122.8(3) |
| C24 | C25 | C26 | 118.0(3) | N5  | C26 | C21 | 119.6(3) |
| N5  | C26 | C25 | 121.4(3) | C21 | C26 | C25 | 119.0(3) |

---

X-ray data for **3g**



**Figure S30.** Compound **3g**.

**Table S6.** Crystal Data for **3g**

---

|                                       |                                                                                                                                                                                                                     |
|---------------------------------------|---------------------------------------------------------------------------------------------------------------------------------------------------------------------------------------------------------------------|
| Empirical Formula                     | C <sub>48</sub> H <sub>74</sub> F <sub>7</sub> N <sub>3</sub>                                                                                                                                                       |
| Formula Weight                        | 826.12                                                                                                                                                                                                              |
| Crystal Color, Habit                  | orange, needle                                                                                                                                                                                                      |
| Crystal Dimensions                    | 0.110 X 0.005 X 0.005 mm                                                                                                                                                                                            |
| Crystal System                        | triclinic                                                                                                                                                                                                           |
| Lattice Parameters                    | $a = 5.5096(9) \text{ \AA}$<br>$b = 16.029(3) \text{ \AA}$<br>$c = 25.975(4) \text{ \AA}$<br>$\alpha = 89.460(6)^\circ$<br>$\beta = 84.761(6)^\circ$<br>$\gamma = 87.863(6)^\circ$<br>$V = 2282.7(7) \text{ \AA}^3$ |
| Space Group                           | P-1 (#2)                                                                                                                                                                                                            |
| Z value                               | 2                                                                                                                                                                                                                   |
| D <sub>calc</sub>                     | 1.202 g/cm <sup>3</sup>                                                                                                                                                                                             |
| $\mu(\text{CuK}\alpha)$               | 7.337 cm <sup>-1</sup>                                                                                                                                                                                              |
| Temperature                           | -180.0°C                                                                                                                                                                                                            |
| No. of Reflections Measured           | Total: 26462<br>Unique: 8116 ( $R_{\text{int}} = 0.1018$ )                                                                                                                                                          |
| Corrections                           | Lorentz-polarization<br>Absorption<br>(trans. factors: 0.583 - 0.996)                                                                                                                                               |
| No. Observations (All reflections)    | 8116                                                                                                                                                                                                                |
| No. Variables                         | 525                                                                                                                                                                                                                 |
| Reflection/Parameter Ratio            | 15.46                                                                                                                                                                                                               |
| Residuals: R1 ( $I > 2.00\sigma(I)$ ) | 0.0939                                                                                                                                                                                                              |
| Residuals: R (All reflections)        | 0.1756                                                                                                                                                                                                              |
| Residuals: wR2 (All reflections)      | 0.2985                                                                                                                                                                                                              |
| Goodness of Fit Indicator             | 0.919                                                                                                                                                                                                               |

---

**Table S7.** Atomic coordinates and  $B_{\text{iso}}/B_{\text{eq}}$  for **3g**

| atom | x         | y           | z            | $B_{\text{eq}}$ |
|------|-----------|-------------|--------------|-----------------|
| F1   | 1.1826(4) | 0.19200(14) | 0.07133(8)   | 5.80(5)         |
| F2   | 0.5021(4) | 0.24293(14) | -0.02396(9)  | 5.81(6)         |
| F3   | 0.5103(4) | 0.40572(14) | -0.00535(8)  | 5.51(5)         |
| F4   | 0.8711(4) | 0.63398(14) | 0.07473(8)   | 5.78(5)         |
| F5   | 1.2276(5) | 0.68939(15) | 0.13106(9)   | 6.83(6)         |
| F6   | 1.5540(5) | 0.58252(15) | 0.16789(9)   | 6.27(6)         |
| F7   | 1.5417(4) | 0.41649(15) | 0.15091(8)   | 5.92(6)         |
| N1   | 1.1993(7) | 0.3546(2)   | 0.09257(12)  | 5.16(7)         |
| N2   | 0.8528(6) | 0.4687(2)   | 0.05272(12)  | 4.84(7)         |
| N3   | 0.8502(6) | 0.1244(2)   | 0.01173(12)  | 4.98(7)         |
| C1   | 1.0232(8) | 0.3296(3)   | 0.06386(14)  | 4.76(9)         |
| C2   | 1.0125(8) | 0.2430(3)   | 0.05127(15)  | 5.11(9)         |
| C3   | 0.8438(8) | 0.2118(3)   | 0.02230(15)  | 4.81(9)         |
| C4   | 0.6760(8) | 0.2711(3)   | 0.00385(15)  | 5.26(9)         |
| C5   | 0.6790(8) | 0.3540(3)   | 0.01401(15)  | 4.90(9)         |
| C6   | 0.8532(8) | 0.3866(3)   | 0.04359(14)  | 4.69(8)         |
| C7   | 1.0271(8) | 0.4945(3)   | 0.08156(15)  | 4.85(8)         |
| C8   | 1.0405(8) | 0.5808(3)   | 0.09394(16)  | 5.14(8)         |
| C9   | 1.2129(8) | 0.6077(3)   | 0.12110(16)  | 5.18(8)         |
| C10  | 1.3822(8) | 0.5520(3)   | 0.14081(16)  | 5.25(8)         |
| C11  | 1.3775(8) | 0.4690(3)   | 0.13131(15)  | 5.09(8)         |
| C12  | 1.1998(8) | 0.4372(3)   | 0.10194(15)  | 4.95(8)         |
| C13  | 0.8695(8) | 0.1049(3)   | -0.04399(15) | 5.51(9)         |
| C14  | 1.0764(8) | 0.1468(3)   | -0.07468(14) | 5.28(9)         |
| C15  | 1.0848(8) | 0.1370(3)   | -0.13323(15) | 5.70(10)        |
| C16  | 1.2889(8) | 0.1853(3)   | -0.16173(14) | 5.41(9)         |
| C17  | 1.2882(8) | 0.1864(3)   | -0.22024(15) | 5.92(10)        |
| C18  | 1.5004(8) | 0.2328(3)   | -0.24714(15) | 6.15(10)        |
| C19  | 1.5017(9) | 0.2391(3)   | -0.30564(16) | 6.86(11)        |
| C20  | 1.7198(9) | 0.2835(3)   | -0.33153(16) | 6.89(12)        |
| C21  | 1.7251(9) | 0.2922(4)   | -0.38994(17) | 7.50(13)        |

|     |             |            |              |           |
|-----|-------------|------------|--------------|-----------|
| C22 | 1.9480(9)   | 0.3340(4)  | -0.41500(17) | 7.50(13)  |
| C23 | 1.9596(10)  | 0.3440(4)  | -0.47379(17) | 8.01(14)  |
| C24 | 2.1848(9)   | 0.3834(4)  | -0.49866(17) | 7.77(13)  |
| C25 | 2.1977(9)   | 0.3935(4)  | -0.55657(17) | 7.72(13)  |
| C26 | 2.4251(9)   | 0.4316(4)  | -0.58142(17) | 7.77(13)  |
| C27 | 2.4372(9)   | 0.4419(4)  | -0.63959(17) | 7.84(14)  |
| C28 | 2.6695(10)  | 0.4771(4)  | -0.66440(18) | 8.26(14)  |
| C29 | 2.6839(10)  | 0.4859(4)  | -0.72264(18) | 8.32(14)  |
| C30 | 2.9198(10)  | 0.5202(4)  | -0.7470(2)   | 10.20(18) |
| C31 | 0.6653(7)   | 0.0785(3)  | 0.04270(14)  | 5.04(9)   |
| C32 | 0.6638(8)   | 0.0911(3)  | 0.10057(14)  | 5.66(10)  |
| C33 | 0.4665(8)   | 0.0445(3)  | 0.13171(14)  | 5.42(9)   |
| C34 | 0.4729(8)   | 0.0528(3)  | 0.18998(14)  | 5.71(10)  |
| C35 | 0.2645(8)   | 0.0103(3)  | 0.22084(15)  | 5.86(10)  |
| C36 | 0.2713(8)   | 0.0116(3)  | 0.27931(15)  | 6.29(11)  |
| C37 | 0.0578(9)   | -0.0303(3) | 0.30839(15)  | 6.64(11)  |
| C38 | 0.0619(9)   | -0.0335(3) | 0.36702(16)  | 6.93(12)  |
| C39 | -0.1576(9)  | -0.0761(3) | 0.39442(16)  | 7.17(12)  |
| C40 | -0.1570(9)  | -0.0819(4) | 0.45277(16)  | 7.60(13)  |
| C41 | -0.3767(9)  | -0.1235(4) | 0.47965(16)  | 7.48(13)  |
| C42 | -0.3784(10) | -0.1300(4) | 0.53791(17)  | 7.73(13)  |
| C43 | -0.5992(10) | -0.1701(4) | 0.56475(16)  | 7.67(13)  |
| C44 | -0.6007(9)  | -0.1762(4) | 0.62315(17)  | 7.51(13)  |
| C45 | -0.8232(10) | -0.2153(4) | 0.65029(17)  | 7.74(13)  |
| C46 | -0.8242(10) | -0.2211(4) | 0.70873(17)  | 7.98(13)  |
| C47 | -1.0490(11) | -0.2579(4) | 0.73573(19)  | 8.72(15)  |
| C48 | -1.0471(13) | -0.2632(4) | 0.7948(2)    | 11.6(2)   |

---


$$B_{eq} = 8/3 \pi^2 (U_{11}(aa^*)^2 + U_{22}(bb^*)^2 + U_{33}(cc^*)^2 + 2U_{12}(aa^*bb^*)\cos \gamma + 2U_{13}(aa^*cc^*)\cos \beta + 2U_{23}(bb^*cc^*)\cos \alpha)$$

**Table S8.** Bond lengths (Å) for **3g**

| atom | atom | distance | atom | atom | distance |
|------|------|----------|------|------|----------|
| F1   | C2   | 1.357(5) | F2   | C4   | 1.345(5) |
| F3   | C5   | 1.351(5) | F4   | C8   | 1.365(5) |
| F5   | C9   | 1.345(5) | F6   | C10  | 1.339(5) |
| F7   | C11  | 1.344(5) | N1   | C1   | 1.351(6) |
| N1   | C12  | 1.350(6) | N2   | C6   | 1.339(5) |
| N2   | C7   | 1.350(5) | N3   | C3   | 1.429(5) |
| N3   | C13  | 1.477(5) | N3   | C31  | 1.456(5) |
| C1   | C2   | 1.433(6) | C1   | C6   | 1.417(6) |
| C2   | C3   | 1.360(6) | C3   | C4   | 1.412(6) |
| C4   | C5   | 1.357(7) | C5   | C6   | 1.402(6) |
| C7   | C8   | 1.430(6) | C7   | C12  | 1.430(6) |
| C8   | C9   | 1.320(7) | C9   | C10  | 1.394(6) |
| C10  | C11  | 1.357(7) | C11  | C12  | 1.408(6) |
| C13  | C14  | 1.506(6) | C14  | C15  | 1.527(5) |
| C15  | C16  | 1.521(6) | C16  | C17  | 1.520(5) |
| C17  | C18  | 1.521(6) | C18  | C19  | 1.521(6) |
| C19  | C20  | 1.520(7) | C20  | C21  | 1.520(6) |
| C21  | C22  | 1.513(7) | C22  | C23  | 1.530(6) |
| C23  | C24  | 1.503(7) | C24  | C25  | 1.507(6) |
| C25  | C26  | 1.504(7) | C26  | C27  | 1.514(6) |
| C27  | C28  | 1.506(7) | C28  | C29  | 1.513(7) |
| C29  | C30  | 1.512(8) | C31  | C32  | 1.518(5) |
| C32  | C33  | 1.511(6) | C33  | C34  | 1.524(5) |
| C34  | C35  | 1.519(6) | C35  | C36  | 1.523(6) |
| C36  | C37  | 1.513(6) | C37  | C38  | 1.526(6) |
| C38  | C39  | 1.527(7) | C39  | C40  | 1.518(6) |
| C40  | C41  | 1.515(7) | C41  | C42  | 1.515(6) |
| C42  | C43  | 1.508(7) | C43  | C44  | 1.518(6) |
| C44  | C45  | 1.511(7) | C45  | C46  | 1.519(6) |
| C46  | C47  | 1.504(8) | C47  | C48  | 1.538(7) |

**Table S9.** Bond angles ( $^{\circ}$ ) for **3g**

| atom | atom | atom | angle    | atom | atom | atom | angle    |
|------|------|------|----------|------|------|------|----------|
| C1   | N1   | C12  | 115.9(4) | C6   | N2   | C7   | 116.2(3) |
| C3   | N3   | C13  | 113.6(3) | C3   | N3   | C31  | 114.0(3) |
| C13  | N3   | C31  | 114.3(3) | N1   | C1   | C2   | 119.5(4) |
| N1   | C1   | C6   | 122.3(4) | C2   | C1   | C6   | 118.2(4) |
| F1   | C2   | C1   | 115.1(4) | F1   | C2   | C3   | 120.9(4) |
| C1   | C2   | C3   | 123.9(4) | N3   | C3   | C2   | 119.4(4) |
| N3   | C3   | C4   | 125.0(4) | C2   | C3   | C4   | 115.5(4) |
| F2   | C4   | C3   | 117.7(4) | F2   | C4   | C5   | 119.1(4) |
| C3   | C4   | C5   | 123.2(4) | F3   | C5   | C4   | 118.7(4) |
| F3   | C5   | C6   | 119.7(4) | C4   | C5   | C6   | 121.6(4) |
| N2   | C6   | C1   | 122.2(4) | N2   | C6   | C5   | 120.3(4) |
| C1   | C6   | C5   | 117.6(4) | N2   | C7   | C8   | 120.5(4) |
| N2   | C7   | C12  | 121.9(4) | C8   | C7   | C12  | 117.6(4) |
| F4   | C8   | C7   | 116.4(4) | F4   | C8   | C9   | 122.0(4) |
| C7   | C8   | C9   | 121.5(4) | F5   | C9   | C8   | 120.8(4) |
| F5   | C9   | C10  | 118.2(4) | C8   | C9   | C10  | 121.0(4) |
| F6   | C10  | C9   | 118.6(4) | F6   | C10  | C11  | 120.8(4) |
| C9   | C10  | C11  | 120.6(4) | F7   | C11  | C10  | 119.6(4) |
| F7   | C11  | C12  | 119.7(4) | C10  | C11  | C12  | 120.7(4) |
| N1   | C12  | C7   | 121.6(4) | N1   | C12  | C11  | 119.8(4) |
| C7   | C12  | C11  | 118.5(4) | N3   | C13  | C14  | 113.6(3) |
| C13  | C14  | C15  | 115.4(4) | C14  | C15  | C16  | 112.3(4) |
| C15  | C16  | C17  | 114.7(4) | C16  | C17  | C18  | 112.9(4) |
| C17  | C18  | C19  | 114.9(4) | C18  | C19  | C20  | 113.7(4) |
| C19  | C20  | C21  | 115.2(4) | C20  | C21  | C22  | 114.2(4) |
| C21  | C22  | C23  | 115.7(4) | C22  | C23  | C24  | 115.5(4) |
| C23  | C24  | C25  | 115.8(4) | C24  | C25  | C26  | 115.7(4) |
| C25  | C26  | C27  | 115.6(4) | C26  | C27  | C28  | 115.2(4) |
| C27  | C28  | C29  | 115.3(4) | C28  | C29  | C30  | 114.6(5) |
| N3   | C31  | C32  | 114.4(3) | C31  | C32  | C33  | 113.3(4) |
| C32  | C33  | C34  | 113.6(4) | C33  | C34  | C35  | 113.2(4) |

|     |     |     |          |     |     |     |          |
|-----|-----|-----|----------|-----|-----|-----|----------|
| C34 | C35 | C36 | 115.4(4) | C35 | C36 | C37 | 113.5(4) |
| C36 | C37 | C38 | 115.4(4) | C37 | C38 | C39 | 113.2(4) |
| C38 | C39 | C40 | 114.6(4) | C39 | C40 | C41 | 114.2(4) |
| C40 | C41 | C42 | 114.8(4) | C41 | C42 | C43 | 114.8(4) |
| C42 | C43 | C44 | 114.7(4) | C43 | C44 | C45 | 114.9(4) |
| C44 | C45 | C46 | 114.7(4) | C45 | C46 | C47 | 114.6(4) |
| C46 | C47 | C48 | 113.8(5) |     |     |     |          |

---
